# Supplementary material for: Chromatin Regulator-Related Gene Signature for Predicting Prognosis and Immunotherapy Efficacy in Breast Cancer
Source: J Oncol. 2023 Jan 30;2023:2736932. doi: 10.1155/2023/2736932 (PMC9902130; doi:10.1155/2023/2736932)
Supplement: Supplementary Materials — Supplementary Table 1: clinical information of BC patients in this study. Supplementary Table 2: chromatin regulators-related differentially expressed genes in breast cancer. [file 2736932.f1.zip]

Archive with 2 entries (2 files):
- Supplementary Table1.docx
- Supplementary Table2.docx
